# Supplementary material
Source: publisher figshare collection journal article supplement (https://karger.figshare.com/ndownloader/files/13303721)

## Online Supplementary Figures S1-S2

**Figure S1.** Funnel plots of prevalence estimates for various forms of AMD stratified by CKD. Blue circle represents CKD, whereas red triangle represents non-CKD. AMD = age-related macular degeneration; CKD = chronic kidney disease; CI = confidence interval.


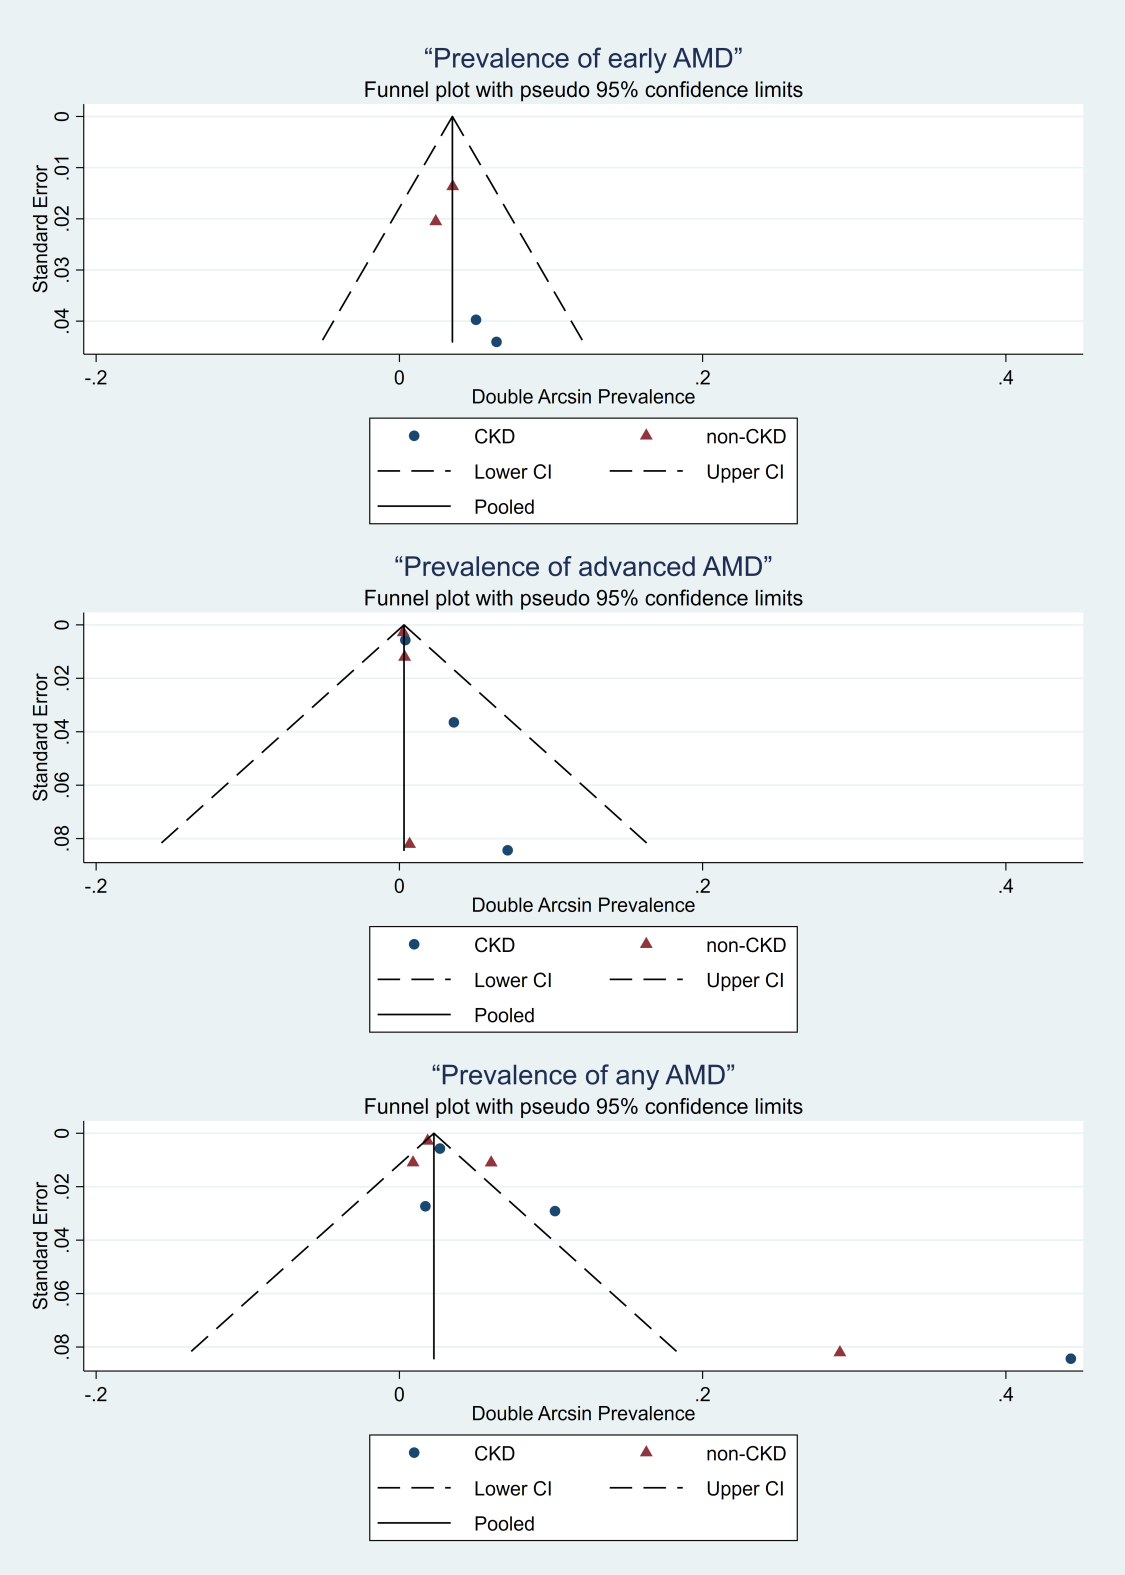


**Figure S2.** Funnel plots of odds ratios estimates in various forms of AMD. AMD = age-related macular degeneration; SE logOR = standard error of log odds ratio.


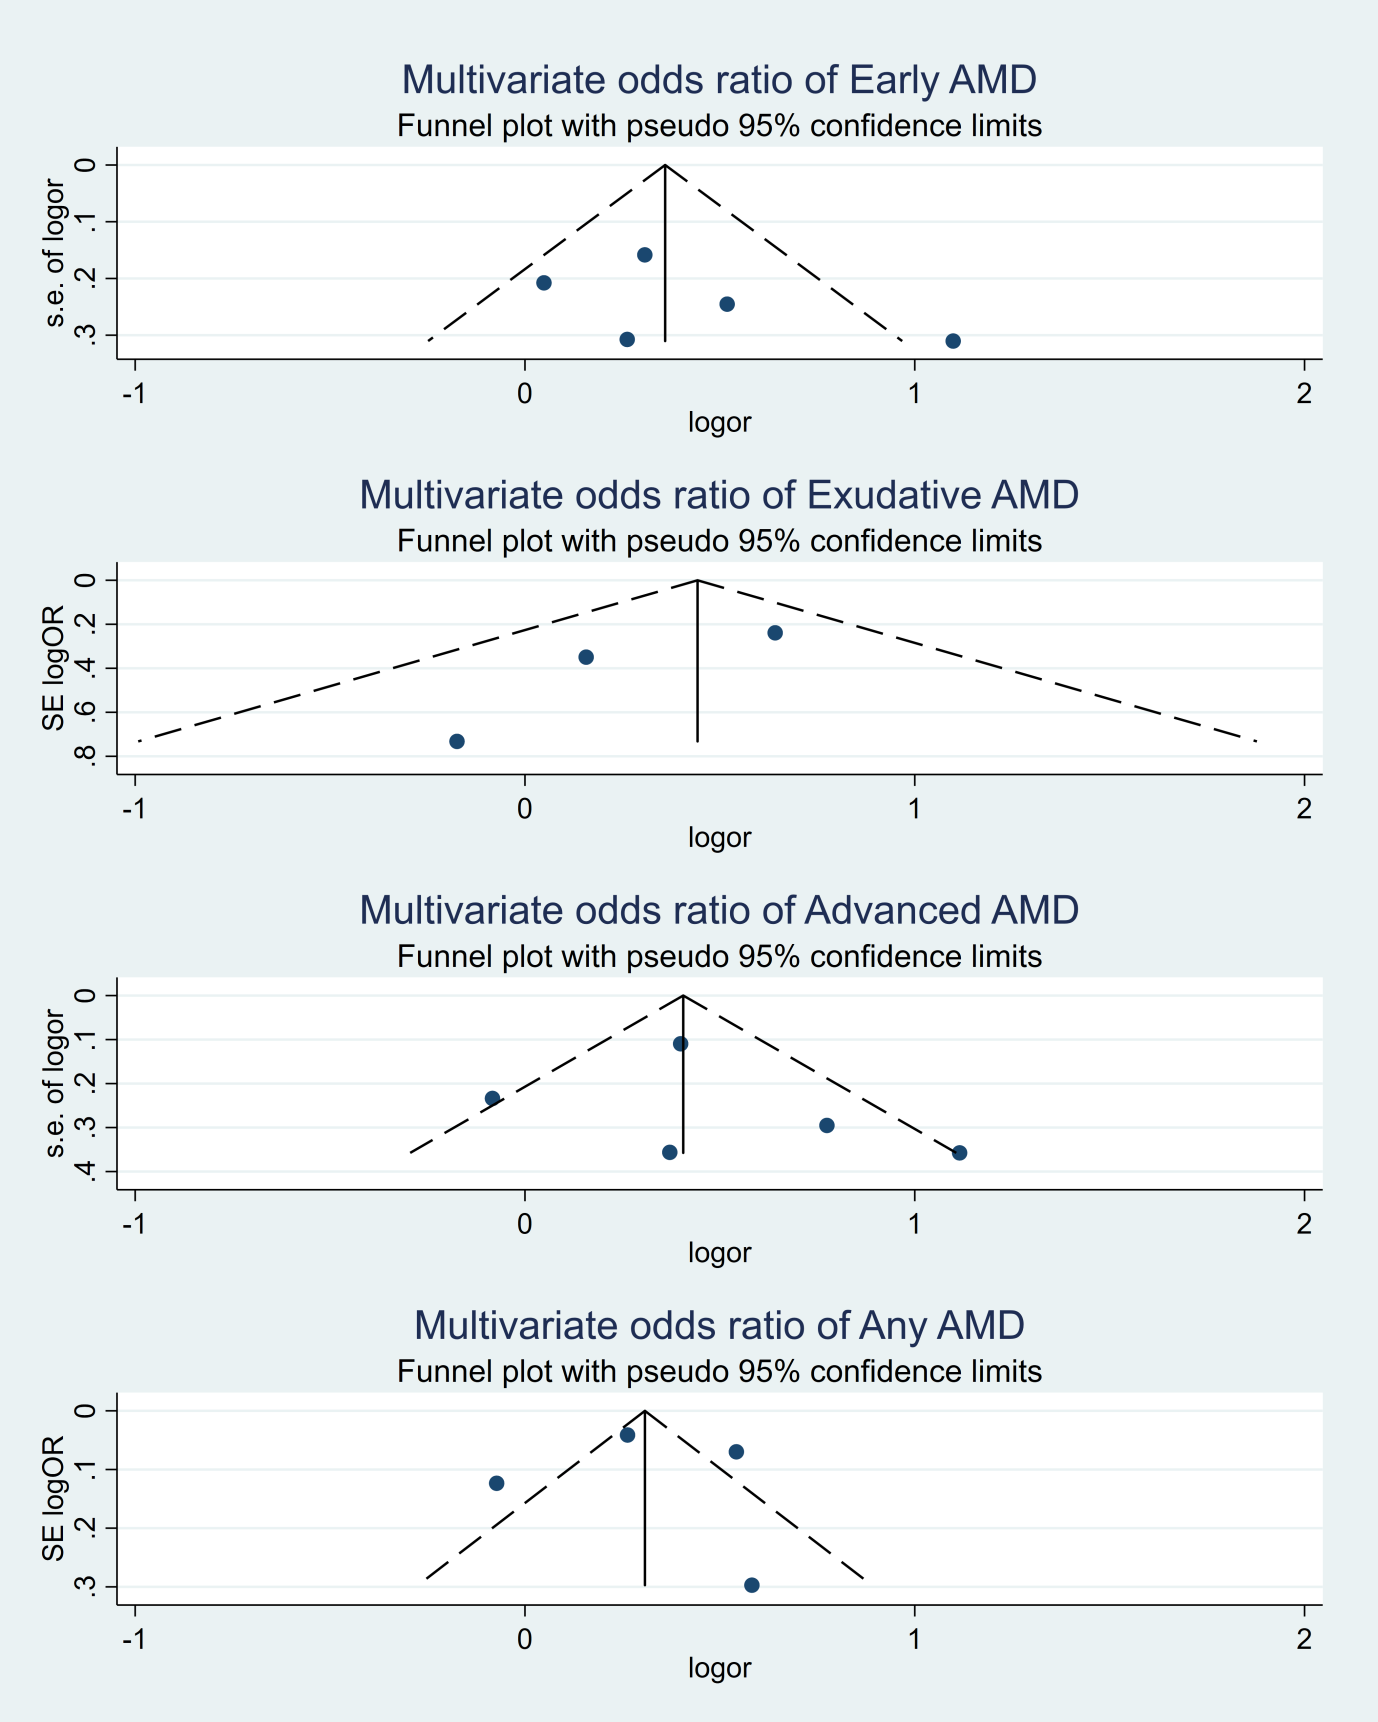

Supplement: Supplementary file 1 [file 13303721]
